# Supplementary material for: Evaluation of Transient Elastography, Acoustic Radiation Force Impulse Imaging (ARFI), and Enhanced Liver Function (ELF) Score for Detection of Fibrosis in Morbidly Obese Patients
Source: PLoS One. 2015 Nov 3;10(11):e0141649. doi: 10.1371/journal.pone.0141649 (PMC4631322; doi:10.1371/journal.pone.0141649)
Supplement: S1 Dataset — (XLSX) [file pone.0141649.s001.xlsx]

## Sheet: bariatric cohort
No*	Sex (0=female)	Age (years)	Size (m)	Weight_A (kg)	Weight_B (kg)	Capsule_distance_A (mm)	TE_A (kPa)	Sono_A_rARFI_Median (m/s)	Sono_A_rARFI_IQR%median	Sono_A_rARFI_SR (%)	Capsule_distance_B (mm)	TE_B (kPa)	Sono_B_rARFI_Median (%)	Sono_B_rARFI_IQR%Median	Sono_B_rARFI_SR (%)	MR_A_Spektro_Seg_7	MR_A_Volume (ml)	MR_B_Spektro_Seg_7	MR_B_Volume (ml)	Histology_steatosis (NAS)	Histo_fibrosis (NAS)	ELF_A_Score	ELF_B_Score
ID_01	1	52.3108	1.7	145.8	141	42	invalid	invalid	46.2555	58.8235	39	invalid	invalid	46	58.8235	17.1638	2695	13.0458	2323	1	1	9.18	8.48
ID_02	0	55.3718	1.58	116.8	112.9	17	invalid	1.22	125.41	60	29	invalid	0.73	19.1781	90	11.1719	1762	-	1747	1	1	10.16	11.14
ID_03	1	33.2548	1.86	149.4	144.3	38.1	invalid	2.77	64.7112	83.3333	27	invalid	3.3	39.3939	100	7.69308	2055	7.76702	1573	1	1	8.71	8.82
ID_04	1	41.2441	1.8	164	158.6	39	invalid	2.32	60.7759	81.8182	35	4.8	2.17	69.47	83.3333	25.1643	-	17.2014	2271	1	1	7.95	7.18
ID_05	0	51.0787	1.72	139.5	138.5	41.1	invalid	3.685	13.9756	66.6667	34.7	invalid	2.52	105.754	66.6667	12.535	2375	22.1288	2222	1	1	10.24	10.83
ID_08	0	29.2712	1.84	121.2	117.9	25.9	3.9	0.96	63.5417	90.9091	32	invalid	2.31	29.0043	100	2.01259	2859	3.17695	2187	1	1	8.88	7.86
ID_09	0	45.1566	1.6	118.9	113.5	42	6.45	invalid	86.3402	55.5556	34	4.1	invalid	50.7965	55.5556	2.01259	2026	3.02587	1835	1	1	8.55	8
ID_10	0	31.3191	1.76	158.5	154	70.5	invalid	2.065	30.3874	100	44	invalid	2.63	69.5817	100	16.8258	3544	14.0964	3464	1	1	8.1	7.42
ID_11	1	54.0959	1.76	135.5	132.2	41	5.3	1.75	90.4286	71.4286	33.2	8.05	1.22	10.6557	100	24.4847	2855	23.0458	2692	3	1	8.41	8.22
ID_12	0	32.2199	1.72	135.9	130.2	29.9	3	2.55	85.4902	90.9091	28.5	2.9	1.645	122.34	66.6667	8.56781	2681	5.31828	2226	1	1	8.04	7.69
ID_13	1	33.5369	1.77	137.4	131	39.2	7.6	1.885	72.9443	100	38.2	6.7	1.775	41.6901	83.3333	33.4253	2824	34.2412	2290	3	1	8.77	7.67
ID_14	0	46.8706	1.75	103.1	98.2	28.9	2.55	1.56	175.801	90.9091	29.6	3.95	1.05	58.8095	76.9231	3.09301	1830	0.695903	1433	1	1	9.54	9.91
ID_16	1	58.8435	1.62	126.5	125.2	51	invalid	invalid	78.2609	52.6316	51	invalid	2.335	55.3533	83.3333	11.6631	2388	8.50148	2274	1	1	10.57	9.67
ID_17	0	54.6161	1.61	105.4	100.1	42.3	4.55	2.48	43.9516	66.6667	31.9	11.5	invalid	40.3448	58.8235	12.9243	2107	12.5119	1597	1	1	9.19	8.7
ID_18	0	39.1523	1.56	104.7	99.9	31	3.05	0.74	15.2027	100	30.5	5.75	1.885	59.8143	83.3333	13.9904	1999	11.405	1705	1	1	8.62	7.71
ID_20	0	31.4807	1.74	136.9	129.6	35.8	invalid	1.295	21.6216	76.9231	39	5.05	2.26	32.5221	100	5.2608	1958	-	1551	1	1	8.19	7.29
ID_21	0	58.3233	1.52	115.1	110.1	43.9	invalid	3.725	51.5436	71.4286	41.3	invalid	2.64	30.7765	83.3333	-	2386	-	1994	2	1	9.52	9.08
ID_22	0	46.4051	1.7	149.2	143.1	30.2	invalid	0.79	256.962	76.9231	28	invalid	0.88	7.67045	100	-	2129	-	1954	1	1	9.44	9.93
ID_23	0	54.3478	1.66	135.9	130.2	29	4.65	2.575	48.0583	100	41.8	5.2	2.02	32.4257	100	-	3241	41.3617	2404	3	1	8.92	8.36
ID_25	1	41.4412	1.87	156.4	150.1	36	invalid	2.295	62.0915	83.3333	39.1	invalid	2.705	35.4898	83.3333	6.34244	2378	8.20402	2002	1	1	9.62	8.35
ID_26	0	50.1643	1.74	161.1	154	51.7	10.45	2.845	39.2794	76.9231	49.3	12	2.855	41.5061	83.3333	29.6815	3209	23.7702	2685	2	1	9.91	-
ID_27	1	33.5834	1.89	185.5	174.8	52.9	13.9	2.085	32.9736	90.9091	42.6	11.5	2.685	38.2682	66.6667	21.8745	2844	22.1288	2508	2	1	8.39	8.38
ID_28	0	30.9084	1.62	149.6	143	49.8	invalid	2.695	42.7644	83.3333	41.5	7.75	3.51	44.5157	76.9231	29.4576	2785	21.9984	2656	2	1	7.26	-
ID_29	1	40.4036	2.03	180.5	173.4	40.4	invalid	invalid	13.7973	16.6667	36.4	invalid	2.915	45.283	62.5	5.72197	3330	1.46832	2890	1	1	9.14	9.12
ID_31	0	42.7253	1.62	142.1	135.6	37.6	invalid	1.655	37.3112	100	34.6	12.4	1.84	32.6087	90	18.0397	2486	12.538	2170	1	1	8.94	9.21
ID_32	1	44.0642	1.75	155.8	148.5	42	invalid	1.28	111.328	83.3333	42.5	invalid	invalid	28.9941	47.3684	18.3351	2520	10.3491	2367	1	1	8.46	8.05
ID_34	0	55.777	1.59	104.1	100.4	32.7	3.35	0.695	11.5108	100	27.9	invalid	0.85	11.1765	100	23.3372	2075	18.2531	1649	2	1	10.09	11.85
ID_35	0	36.7758	1.72	128.7	124.6	39	4.35	1.325	91.6981	76.9231	32.9	invalid	0.73	22.9452	100	0.34756	1925	1.58249	1497	3	1	7.69	7.95
ID_36	0	37.7943	1.75	135.3	133.5	34.8	6.05	2.095	23.6277	100	33.1	4.3	1.57	50.4777	100	17.2935	2849	14.2087	2699	3	1	-	8.28
ID_37	0	28.1075	1.74	135.1	128.1	27.6	2.95	1.18	15.4661	100	33.3	4	1.055	39.3365	100	0.348685	2108	2.83628	1724	2	1	8.68	7.22
ID_38	1	54.7585	1.78	165.7	158.1	41.4	75	2.835	21.0758	76.9231	40.4	invalid	3.76	23.1383	83.3333	7.8203	4308	3.3005	3436	1	3	10.86	11.01
ID_40	1	49.7098	1.75	155.9	152	51.8	invalid	3.225	15.1938	90.9091	51.7	invalid	3.69	24.5257	76.9231	31.0079	3121	3.17082	2634	1	1	9.05	7.99
ID_44	0	52.2506	1.66	127.8	127.7	32	3.15	2.065	45.0363	100	31.8	3.85	2.465	74.4422	100	7.41218	2363	7.22228	2432	1	1	9.35	9.28
ID_46	0	42.8622	1.8	150.3	146	34.1	invalid	0.86	75.2907	66.6667	32.8	invalid	1.3	146.154	100	5.09787	1976	8.62534	1906	1	1	8.68	7.59
ID_47	1	63.6157	1.76	166.2	162	38	invalid	3.57	29.6919	62.5	40	7.9	0.715	45.8042	100	16.5385	3633	22.3121	3237	2	1	9.75	9.71
ID_48	0	62.4713	1.65	150	141.1	44.3	17.3	2.36	51.6949	76.9231	43.2	21.3	1.79	197.626	90.9091	31.1895	2985	37.432	2349	2	1	9.7	9.97
ID_49	0	53.7646	1.6	137.8	132.3	48.3	invalid	3.245	34.8998	83.3333	34.7	16.45	3.01	41.3621	71.4286	23.28	2912	32.4507	2483	2	1	9.41	9.42
ID_50	0	51.6619	1.69	141	135	35	invalid	invalid	13.943	16.6667	37.9	invalid	0.795	19.1824	71.4286	4.56946	2288	2.97512	1718	3	1	8.64	8.36
ID_51	0	59.977	1.58	150	142.5	44	invalid	3.42	46.2719	76.9231	39.2	invalid	2.835	17.0194	83.3333	34.9478	2333	27.4427	2164	2	1	10.86	9.87
ID_52	0	53.9508	1.56	117.1	114.4	29.8	3.85	0.745	25.5034	83.3333	31.2	invalid	0.815	12.5767	83.3333	3.03812	2320	1.35642	2241	1	1	9.04	9.23
ID_53	0	38.6184	1.68	120.2	114.4	32.3	5.35	0.895	10.8939	100	29.3	7.5	1.15	43.6957	100	9.7574	2487	0.541178	1796	1	1	8.73	8.35
*missing Ids: excluded from analysis
Exam A: before diet
Exam B: after diet

## Sheet: non-bariatric NAFLD cohort
NAFLD_ID*	ELF	Histology_fibrosis (NAS)
1	8.43	1
2	11.15	2
3	9.3	1
4	9.92	1
5	8.66	1
6	9.06	1
7	8.14	0
8	8.22	1
9	8.63	1
10	10.72	4
11	8.67	0
12	8.72	1
13	11.43	1
14	7.51	1
15	8.72	1
16	9.98	2
17	-	1
18	7.97	1
19	10.62	1
20	6.9	1
21	8.87	1
22	8.39	1
23	8.74	1
25	9.46	1
26	10.91	0
28	8.71	0
29	12.58	4
31	11.99	3
34	8.59	1
36	10.15	3
37	9.34	1
39	8.09	1
40	7.6	1
41	13.99	4
45	9.18	1
49	8.14	1
50	8.98	1
51	8.65	0
52	9.23	1
54	8.69	0
57	8.52	1
58	9.35	1
66	7.97	1
68	9.99	3
71	8.58	0
72	-	1
74	9.49	0
76	10.22	1
77	8.05	0
79	8.29	0
*missing IDs: excluded from analysis and / or ELF score not available
